# Supplementary material
Source: Springer Nature journal article supplement (https://www.springermedizin.de/resource/supplementary/13041_2009_30_MOESM4_ESM.pdf/25657446)

# Hippocampus

**A**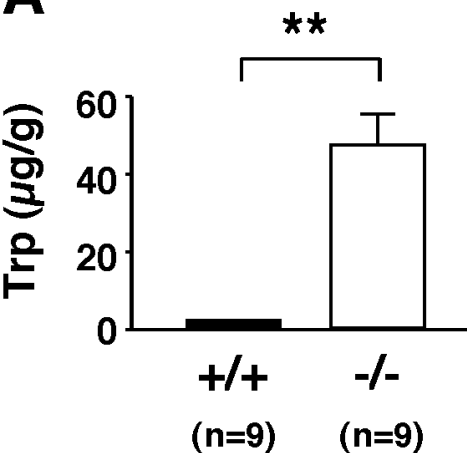**B**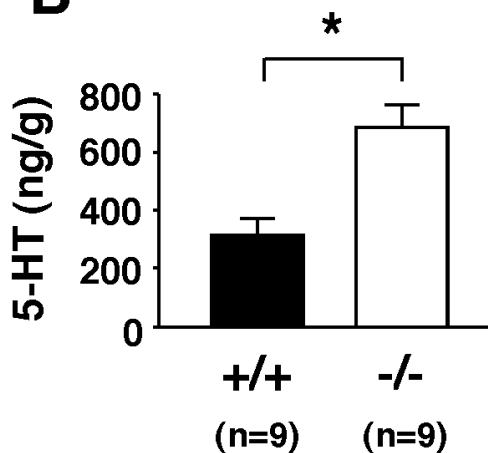**C**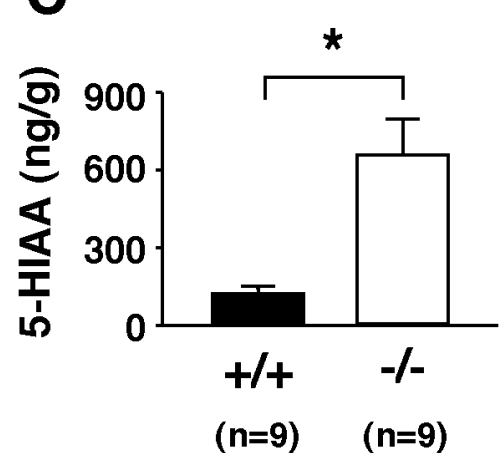

# Midbrain

**D**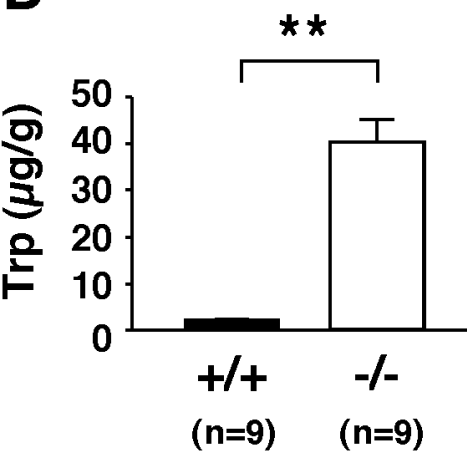**E**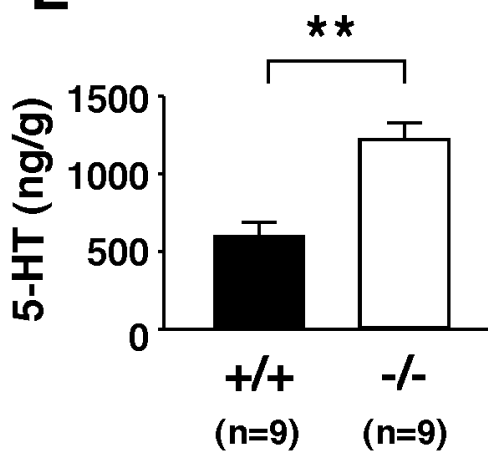**F**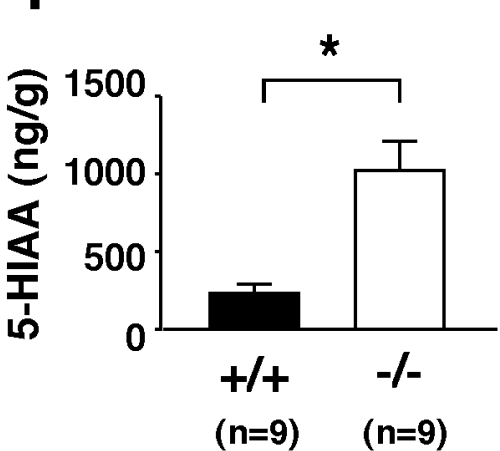**G**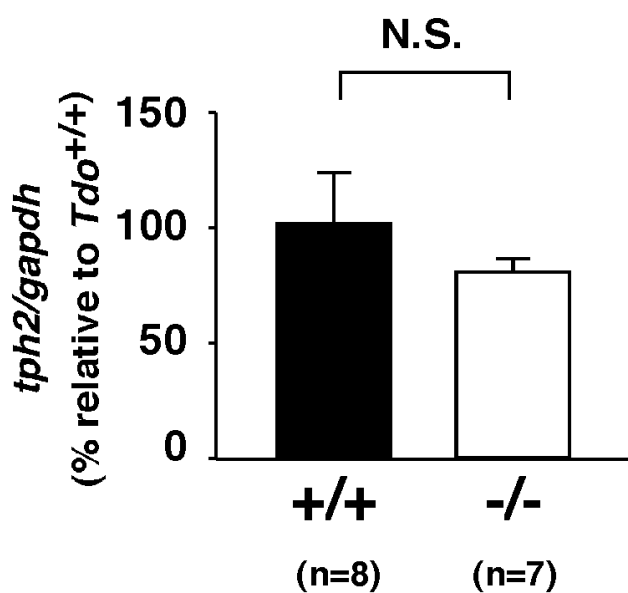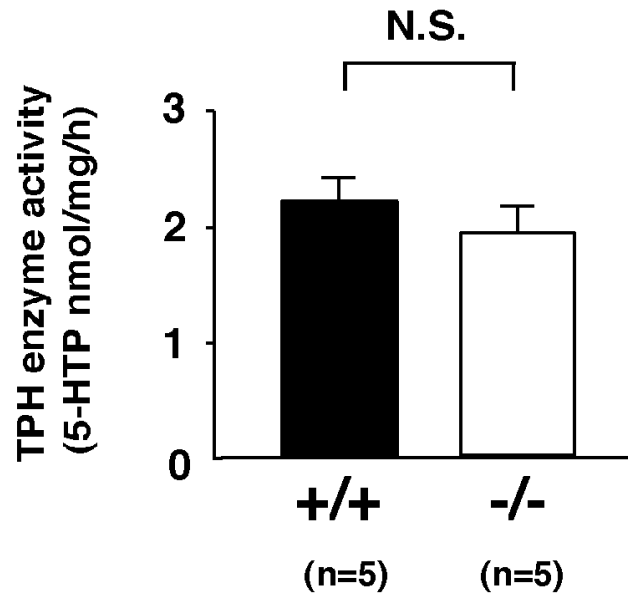

Supplement: MOESM4 [file 25657446]
